# Supplementary material for: Genome-Wide Identification and Expression Profiling of the TCP Family Genes in Spike and Grain Development of Wheat (Triticum aestivum L.)
Source: Front Plant Sci. 2018 Sep 10;9:1282. doi: 10.3389/fpls.2018.01282 (PMC6160802; doi:10.3389/fpls.2018.01282)
Supplement: DATASET S3 — Stop-gained mutation sites list in the Kronos mutant L3090. [file Table_3.XLS]

## Sheet: stop gain
Supplemental Dataset 3 Stop-gained mutation sites list in the Kronos mutant L3090.
seqid	position	chr	chr_position	ref_base	wt_base	mut_base	hethom	wt_cov	mut_cov	confidence	Effect_gene	Effect_consequence	Effect_amino_acid	Effect_codon_change	MSU7-GeneID	MSU7-Annotation	MapMan-Annotation
IWGSC_CSS_4BL_scaff_7041022	14672	4B	283796965	C	C	T	het	2	6	het5hom3	Traes_4BL_6E9EBF553.1	stop_gained	Q119*	Cag/Tag	LOC_Os03g09910.1	protein|aminotransferase, classes I and II, domain containing protein, expressed	amino acid metabolism.synthesis.aromatic aa.phenylalanine and tyrosine	AGD2	highly similar to ( 503) AT4G33680 | Symbols: AGD2 | AGD2 (ABERRANT GROWTH AND DEATH 2); L,L-diaminopimelate aminotransferase/ transaminase | chr4:16171847-16174630 REVERSE PRK07590 COG0436 PRK09276 PRK08068 PRK07682 Aminotran_1_2 PRK06108 PRK07681 PRK05764 PRK08361 PRK09148 PRK07212 PRK05942 ARO8 HisC PRK07366 PRK06220 PRK07683 PRK07337 PRK08175 PRK06290 PRK06375 PRK08636 PRK08362 PRK07550 PRK06…
IWGSC_CSS_2BS_scaff_5177853	12492	2B	200782750	G	G	A	hom	0	51	het5hom3	Traes_2BS_83944806B.1	stop_gained	W298*	tgG/tgA	LOC_Os07g36630.1	protein|CSLF8 - cellulose synthase-like family F; beta1,3;1,4 glucan synthase, expressed	cell wall.cellulose synthesis.cellulose synthase	CSLD3	highly similar to ( 790) AT3G03050 | Symbols: CSLD3, KJK, ATCSLD3 | CSLD3 (CELLULOSE SYNTHASE-LIKE D3); cellulose synthase/ transferase, transferring glycosyl groups | chr3:687873-691629 FORWARDCellulose_synt protein|CSLF8 - cellulose synthase-like family F; beta1,3;1,4 glucan synthase, expressed
IWGSC_CSS_4AS_scaff_5947083	3748	4A	83671684	G	G	A	het	14	10	het5hom3	Traes_4AS_184AF3824.1	stop_gained	R780*	Cga/Tga	LOC_Os03g19520.2	protein|cyclin-related protein, putative, expressed	cell.cycle		highly similar to ( 840) AT5G26850 | Symbols: | INVOLVED IN: biological_process unknown; LOCATED IN: chloroplast; EXPRESSED IN: 23 plant structures; EXPRESSED DURING: 13 growth stages; BEST Arabidopsis thaliana protein match is: cyclin-related (TAIR:AT2G41830.1); Has 199 Blast hits to 197 proteins in 66 species: Archae - 0; Bacteria - 0; Metazoa - 113; Fungi - 19; Plants - 59; Viruses - 0; Other …
IWGSC_CSS_4AS_scaff_5980440	8353	4A	31266883	G	G	A	het	21	7	het5hom3	Traes_4AS_3EF63342E.1	stop_gained	W278*	tgG/tgA	LOC_Os03g12414.2	protein|cyclin, putative, expressed	cell.cycle	SDS	weakly similar to ( 189) AT1G14750 | Symbols: SDS | SDS (SOLO DANCERS); cyclin-dependent protein kinase | chr1:5079674-5082423 REVERSE COG5024 protein|cyclin, putative, expressed
IWGSC_CSS_1AL_scaff_2959292	3170	1A		C	C	T	hom	0	8	het5hom3	Traes_1AL_9C9EE44BB.1	stop_gained	Q391*	Cag/Tag	LOC_Os05g41750.1	protein|RecF/RecN/SMC N terminal domain containing protein, expressed	cell.division	ATSMC3	highly similar to ( 542) AT5G48600 | Symbols: ATSMC3, ATCAP-C, ATSMC4 | ATSMC3 (ARABIDOPSIS THALIANA STRUCTURAL MAINTENANCE OF CHROMOSOME 3); ATP binding / transporter | chr5:19701908-19709091 FORWARD ABC_SMC4_euk Smc SMC_N ABC_SMC1_euk ABC_SMC_head ABC_SMC_barmotin ABC_SMC2_euk ABC_Class2 protein|RecF/RecN/SMC N terminal domain containing protein, expressed
IWGSC_CSS_4BL_scaff_7038204	2493	4B		G	G	A	hom	0	22	het5hom3	Traes_4BL_DFD8B778D.1	stop_gained&splice_region_variant	W251*	tGg/tAg	LOC_Os03g19870.3	protein|ATP binding protein, putative, expressed	cell.division	QQT2	moderately similar to ( 429) AT4G21800 | Symbols: QQT2 | QQT2 (quatre-quart2); ATP binding / nucleotide binding | chr4:11573289-11574976 FORWARD ATP_bind_1 COG1100 protein|ATP binding protein, putative, expressed
IWGSC_CSS_2BL_scaff_7970112	6595	2B	218662643	C	C	T	hom	0	5	het5hom3	Traes_2BL_DCA0AFEE6.1	stop_gained	W215*	tgG/tgA	LOC_Os04g41280.1	protein|ankyrin repeat domain containing protein, expressed	cell.organisation	protein binding	highly similar to ( 682) AT5G14230 | Symbols: | protein binding | chr5:4591883-4595775 FORWARD ANK protein|ankyrin repeat domain containing protein, expressed
IWGSC_CSS_6AL_scaff_5764701	2515	6A	165235301	C	C	T	het	9	8	het5hom3	Traes_6AL_AC4D1A67F.2	stop_gained	W450*	tgG/tgA	LOC_Os02g48740.1	protein|fimbrin-like protein 2, putative, expressed	cell.organisation	FIM2	highly similar to ( 877) AT5G35700 | Symbols: FIM2 | FIM2 (FIMBRIN-LIKE PROTEIN 2); actin binding | chr5:13872833-13876432 REVERSE SAC6 CH protein|fimbrin-like protein 2, putative, expressed
IWGSC_CSS_6BL_scaff_4219126	71	6B		G	G	A	het	11	3	het3hom2	Traes_6BL_5A3A7F8C9.1	stop_gained	W17*	tgG/tgA	LOC_Os02g56750.1	protein|OsFBX65 - F-box domain containing protein, expressed	cell.organisation	MEE66	weakly similar to ( 167) AT2G02240 | Symbols: MEE66 | MEE66 (maternal effect embryo arrest 66) | chr2:592359-593602 REVERSE protein|OsFBX65 - F-box domain containing protein, expressed
IWGSC_CSS_1BL_scaff_3845339	2487	1B	177020190	C	C	T	het	2	11	het5hom3	Traes_1BL_667A4DAAF.2	stop_gained	Q247*	Cag/Tag	LOC_Os05g28720.1	protein|PPR repeat containing protein, expressed	development.unspecified	pentatricopeptide (PPR) repeat-containing protein	highly similar to ( 520) AT3G62470 | Symbols: | pentatricopeptide (PPR) repeat-containing protein | chr3:23106600-23108399 REVERSEweakly similar to ( 144) RF1_ORYSA Rf1 protein, mitochondrial precursor (PPR protein) (Fertility restorer) (Restorer for CMS) - Oryza sativa (Rice) protein|PPR repeat containing protein, expressed
IWGSC_CSS_2BL_scaff_7998870	7058	2B	221062004	C	C	T	hom	0	50	het5hom3	Traes_2BL_2784BC27C.2	stop_gained	W688*	tGg/tAg	LOC_Os04g41850.1	protein|NIN, putative, expressed	development.unspecified	RWP-RK domain-containing protein	highly similar to ( 536) AT3G59580 | Symbols: | RWP-RK domain-containing protein | chr3:22009652-22012721 FORWARDRWP-RK PB1 protein|NIN, putative, expressed
IWGSC_CSS_3AS_scaff_3390361	1512	3A		G	G	A	het	13	9	het5hom3	Traes_3AS_5932BE6D9.1	stop_gained	W90*	tgG/tgA	LOC_Os01g11810.2	protein|powdery mildew resistant protein 5, putative, expressed	development.unspecified		moderately similar to ( 385) AT1G29050 | Symbols: | unknown protein | chr1:10136376-10139082 REVERSEDUF231 protein|powdery mildew resistant protein 5, putative, expressed
IWGSC_CSS_7AL_scaff_4496251	2853	7A		G	G	A	het	10	9	het5hom3	Traes_7AL_D7FA36B92.1	stop_gained	Q184*	Cag/Tag	LOC_Os03g35340.1	protein|expressed protein	development.unspecified	EMB2016	highly similar to ( 768) AT3G05680 | Symbols: EMB2016 | EMB2016 (embryo defective 2016) | chr3:1660802-1672015 REVERSE protein|expressed protein
IWGSC_CSS_6BL_scaff_1002577	1160	6B		C	C	T	het	17	3	het3hom2	Traes_6BL_574F391B8.2	stop_gained	W532*	tgG/tgA	LOC_Os02g42590.1	protein|WD-40 repeat family protein, putative, expressed	development.unspecified	WD-40 repeat family protein	highly similar to ( 564) AT5G54200 | Symbols: | WD-40 repeat family protein | chr5:21993565-21997076 REVERSE WD40 COG2319 protein|WD-40 repeat family protein, putative, expressed
IWGSC_CSS_4BL_scaff_6982143	686	4B	19531690	C	C	T	hom	0	46	het5hom3	Traes_4BL_5FD1C7C2C.1	stop_retained_variant		tGa/tAa	LOC_Os03g22200.2	protein|nodulin MtN3 family protein, putative, expressed	development.unspecified	|nodulin MtN3 family protein	very weakly similar to (93.2) AT2G39060 | Symbols: | nodulin MtN3 family protein | chr2:16306818-16308206 REVERSE MtN3_slv protein|nodulin MtN3 family protein, putative, expressed
IWGSC_CSS_2AS_scaff_5244169	2188	2A		G	G	A	hom	0	25	het5hom3	Traes_2AS_8B6E44000.1	stop_gained	Q590*	Cag/Tag	LOC_Os07g48360.1	protein|helicase conserved C-terminal domain containing protein, expressed	DNA.unspecified	RECQL2	moderately similar to ( 305) AT1G31360 | Symbols: RECQL2 | RECQL2 (ARABIDOPSIS RECQ HELICASE L2); 3-5 DNA helicase/ ATP-dependent helicase/ four-way junction helicase/ protein binding | chr1:11233174-11237412 FORWARD RecQ PRK11057 SrmB HELICc RQC DEAD COG1205 DEXDc Lhr HELICc Helicase_C protein|helicase conserved C-terminal domain containing protein, expressed
IWGSC_CSS_5BS_scaff_2285519	10779	5B	68664982	C	C	T	hom	0	74	het5hom3	Traes_5BS_9E8C8FAB0.2	stop_gained	Q657*	Cag/Tag	LOC_Os10g25220.1	protein|SAP domain containing protein, expressed	DNA.unspecified	SAP domain-containing protein	weakly similar to ( 161) AT5G66840 | Symbols: | SAP domain-containing protein | chr5:26692922-26695296 REVERSE protein|SAP domain containing protein, expressed
IWGSC_CSS_5BL_scaff_10926834	6356	5B	148199849	G	G	A	hom	3	21	het5hom3	Traes_5BL_10EF2471E.1	stop_gained	Q15*	Cag/Tag	LOC_Os02g17940.3	protein|leucoanthocyanidin dioxygenase, putative, expressed	hormone metabolism.ethylene.synthesis-degradation	oxidoreductase, 2OG-Fe(II) oxygenase family protein	moderately similar to ( 286) AT5G20400 | Symbols: | oxidoreductase, 2OG-Fe(II) oxygenase family protein | chr5:6894871-6896185 FORWARDweakly similar to ( 172) LDOX_MALDO Leucoanthocyanidin dioxygenase (EC 1.14.11.19) (LDOX) (Leucocyanidin oxygenase) (Leucoanthocyanidin hydroxylase) (Anthocyanidin synthase) - Malus domestica (Apple) (Malus sylvestris) PcbC 2OG-FeII_Oxy protein|leucoanthocyanidin d…
IWGSC_CSS_6AL_scaff_5752394	273	6A		G	G	A	het	2	4	het4hom3	Traes_6AL_022875F09.1	stop_gained&splice_region_variant	Q68*	Caa/Taa	LOC_Os02g53180.3	protein|1-aminocyclopropane-1-carboxylate oxidase protein, putative, expressed	hormone metabolism.ethylene.synthesis-degradation	EFE	moderately similar to ( 373) AT1G05010 | Symbols: EFE, ACO4, EAT1 | EFE (ETHYLENE-FORMING ENZYME); 1-aminocyclopropane-1-carboxylate oxidase | chr1:1431419-1432695 REVERSEmoderately similar to ( 398) ACCO1_ORYSA 1-aminocyclopropane-1-carboxylate oxidase 1 (EC 1.14.17.4) (ACC oxidase 1) (Ethylene-forming enzyme) (EFE) - Oryza sativa (Rice) PcbC 2OG-FeII_Oxy protein|1-aminocyclopropane-1-carboxylat…
IWGSC_CSS_2AS_scaff_5222839	12744	2A	10055302	G	G	A	hom	1	51	het5hom3	Traes_2AS_5A5258192.1	stop_gained	W2180*	tgG/tgA	LOC_Os05g22940.1	protein|acetyl-CoA carboxylase, putative, expressed	lipid metabolism.FA synthesis and FA elongation.Acetyl CoA Carboxylation.homomeric Enzyme	ACC1	nearly identical (3071) AT1G36160 | Symbols: ACC1, AT-ACC1, EMB22, GK, PAS3 | ACC1 (ACETYL-COENZYME A CARBOXYLASE 1); acetyl-CoA carboxylase | chr1:13534196-13543773 FORWARDmoderately similar to ( 226) MCCA_ORYSA Methylcrotonoyl-CoA carboxylase subunit alpha, mitochondrial precursor (EC 6.4.1.4) (3-methylcrotonyl-CoA carboxylase 1) (MCCase subunit alpha) (3-methylcrotonyl-CoA:carbon dioxide ligas…
IWGSC_CSS_5BL_scaff_10739511	1776	5B		G	G	A	het	23	21	het5hom3	Traes_5BL_E2A5162A3.2	stop_gained	W77*	tgG/tgA	LOC_Os01g73580.1	protein|glycosyl hydrolases, putative, expressed	major CHO metabolism.degradation.sucrose.invertases.cell wall	ATCWINV1	highly similar to ( 507) AT3G13790 | Symbols: ATCWINV1, ATBFRUCT1 | ATBFRUCT1; beta-fructofuranosidase/ hydrolase, hydrolyzing O-glycosyl compounds | chr3:4533084-4535831 REVERSEnearly identical (1036) INV4_ORYSA Beta-fructofuranosidase, insoluble isoenzyme 4 precursor (EC 3.2.1.26) (Sucrose hydrolase 4) (Invertase 4) (Cell wall beta-fructosidase 4) (OsCIN4) - Oryza sativa (Rice) Glyco_32 Glyco_h…
IWGSC_CSS_2AL_scaff_6414365	1748	2A		C	C	T	hom	0	15	het5hom3	Traes_2AL_AA9826E22.1	stop_gained	W65*	tgG/tgA	LOC_Os04g38540.1	protein|aldose 1-epimerase, putative, expressed	minor CHO metabolism.others	aldose 1-epimerase family protein	moderately similar to ( 317) AT5G15140 | Symbols: | aldose 1-epimerase family protein | chr5:4908686-4910670 FORWARD galM Aldose_epim GalM protein|aldose 1-epimerase, putative, expressed
IWGSC_CSS_5AL_scaff_2766939	871	5A		G	G	A	hom	0	46	het5hom3	Traes_5AL_A759491E6.1	stop_gained	Q130*	Cag/Tag	LOC_Os09g36290.1	protein|Ser/Thr protein phosphatase family protein, putative, expressed	misc.acid and other phosphatases	ATPAP29	moderately similar to ( 456) AT5G63140 | Symbols: ATPAP29, PAP29 | ATPAP29 (ARABIDOPSIS THALIANA PURPLE ACID PHOSPHATASE 29); acid phosphatase/ protein serine/threonine phosphatase | chr5:25328237-25329616 FORWARD protein|Ser/Thr protein phosphatase family protein, putative, expressed
IWGSC_CSS_3AS_scaff_2421875	451	3A		C	C	T	het	7	7	het5hom3	Traes_3AS_5851A0870.1	stop_gained	W25*	tgG/tgA	LOC_Os12g44290.1	protein|cytochrome P450, putative, expressed	misc.cytochrome P450	CYP71B37	moderately similar to ( 364) AT3G26330 | Symbols: CYP71B37 | CYP71B37; electron carrier/ heme binding / iron ion binding / monooxygenase/ oxygen binding | chr3:9646873-9648536 REVERSEmoderately similar to ( 402) C71DA_SOYBN Cytochrome P450 71D10 (EC 1.14.-.-) - Glycine max (Soybean) p450 CypX protein|cytochrome P450, putative, expressed
IWGSC_CSS_5BS_scaff_2292586	5363	5B	2164657	C	C	T	het	10	9	het5hom3	Traes_5BS_087C14AE6.2	stop_gained	Q244*	Caa/Taa	LOC_Os05g34380.1	protein|cytochrome P450, putative, expressed	misc.cytochrome P450	CYP51G1	highly similar to ( 509) AT1G11680 | Symbols: CYP51G1, EMB1738, CYP51A2, CYP51 | CYP51G1 (CYTOCHROME P450 51G1); oxygen binding / sterol 14-demethylase | chr1:3938925-3940585 FORWARDhighly similar to ( 514) CP51_SORBI Cytochrome P450 51 (EC 1.14.13.70) (CYPLI) (P450-LIA1) (Obtusifoliol 14-alpha demethylase) - Sorghum bicolor (Sorghum) (Sorghum vulgare) p450 CypX protein|cytochrome P450, putative,…
IWGSC_CSS_7BL_scaff_6668440	2576	7B	242020720	C	C	T	het	43	26	het5hom3	Traes_7BL_EF7F31461.1	stop_gained	W392*	tgG/tgA	LOC_Os01g43851.1	protein|cytochrome P450 72A1, putative, expressed	misc.cytochrome P450	CYP72A14	moderately similar to ( 489) AT3G14680 | Symbols: CYP72A14 | CYP72A14; electron carrier/ heme binding / iron ion binding / monooxygenase/ oxygen binding | chr3:4934478-4936462 FORWARDmoderately similar to ( 461) C72A1_CATRO Cytochrome P450 72A1 (EC 1.3.3.9) (CYPLXXII) (Secologanin synthase) (SLS) - Catharanthus roseus (Rosy periwinkle) (Madagascar periwinkle) p450 CypX protein|cytochrome P450 72A…
IWGSC_CSS_4BS_scaff_4958150	13067	4B	137352029	C	C	T	hom	0	7	het5hom3	Traes_4BS_A5D387FA1.1	stop_gained	W145*	tgG/tgA	LOC_Os06g35630.1	protein|reticuline oxidase-like protein precursor, putative, expressed	misc.nitrilases, *nitrile lyases, berberine bridge enzymes, reticuline oxidases, troponine reductases	FAD-binding domain-containing protein |	moderately similar to ( 406) AT4G20860 | Symbols: | FAD-binding domain-containing protein | chr4:11172726-11174318 FORWARDGlcD FAD_binding_4 protein|reticuline oxidase-like protein precursor, putative, expressed
IWGSC_CSS_2BS_scaff_5197503	3632	2B	153705968	C	C	T	het	1	5	het5hom3	Traes_2BS_635806D07.1	stop_gained	W128*	tgG/tgA	LOC_Os03g05070.1	protein|exostosin family domain containing protein, expressed	misc.UDP glucosyl and glucoronyl transferases	KAM1	highly similar to ( 550) AT2G20370 | Symbols: KAM1, MUR3 | MUR3 (MURUS 3); catalytic/ transferase, transferring glycosyl groups | chr2:8792355-8794214 FORWARDhighly similar to ( 565) KATAM_ORYSA Xyloglucan galactosyltransferase KATAMARI1 homolog (EC 2.4.1.-) - Oryza sativa (Rice) Exostosin protein|exostosin family domain containing protein, expressed
IWGSC_CSS_1BS_scaff_3446317	9102	1B	83764330	C	C	A	het	12	22	het5hom3	Traes_1BS_D85FBF340.1	stop_gained	G79*	Gga/Tga	LOC_Os10g33830.1	protein|MATH domain containing protein, expressed	not assigned.unknown	MATH	MATH protein|MATH domain containing protein, expressed
IWGSC_CSS_1BS_scaff_3463337	9023	1B	99194562	G	G	A	het	5	6	het5hom3	Traes_1BS_243851B3C.3	stop_gained	Q262*	Cag/Tag	LOC_Os05g05130.1	protein|GA20663-PA, putative, expressed	not assigned.unknown		moderately similar to ( 212) AT5G27400 | Symbols: | unknown protein | chr5:9676362-9678285 FORWARD protein|GA20663-PA, putative, expressed
IWGSC_CSS_2BS_scaff_5240253	6968	2B		G	G	A	het	71	67	het5hom3	Traes_2BS_DD098DA8B.2	stop_gained	W1189*	tgG/tgA	LOC_Os07g48350.1	protein|structural constituent of ribosome, putative, expressed	not assigned.unknown	RFR1	highly similar to ( 790) AT3G23590 | Symbols: RFR1 | RFR1 (REF4-related 1) | chr3:8467638-8473469 FORWARD protein|structural constituent of ribosome, putative, expressed
IWGSC_CSS_4AL_scaff_7097165	19940	4A	184415748	G	G	A	het	6	5	het5hom3	Traes_4AL_316A6A39E.2	stop_gained	R187*	Cga/Tga	LOC_Os03g05330.1	protein|HEAT repeat family protein, putative, expressed	not assigned.unknown		nearly identical (1130) AT2G36810 | Symbols: | binding | chr2:15425739-15439462 REVERSE protein|HEAT repeat family protein, putative, expressed
IWGSC_CSS_4BL_scaff_7008823	3341	4B	307561675	C	C	T	het	6	11	het5hom3	Traes_4BL_85FA0FC2C.2	stop_gained	Q326*	Cag/Tag	LOC_Os03g03180.1	protein|uncharacterized Cys-rich domain containing protein, putative, expressed	not assigned.unknown	|proline-rich family protein	moderately similar to ( 319) AT1G63830 | Symbols: | proline-rich family protein | chr1:23685408-23687098 FORWARD protein|uncharacterized Cys-rich domain containing protein, putative, expressed
IWGSC_CSS_5BL_scaff_10900819	5161	5B	198411656	C	C	T	hom	0	12	het5hom3	Traes_5BL_813CF7475.1	stop_gained	W132*	tGg/tAg	LOC_Os09g35810.1	protein|NC domain-containing protein, putative, expressed	not assigned.unknown	NC domain-containing protein-related	moderately similar to ( 336) AT1G01225 | Symbols: | NC domain-containing protein-related | chr1:96064-97242 FORWARD protein|NC domain-containing protein, putative, expressed
IWGSC_CSS_5BL_scaff_10903800	14854	5B	261280737	G	G	A	het	7	12	het5hom3	Traes_5BL_95D5BC3FE.2	stop_gained	W507*	tGg/tAg	LOC_Os03g61620.1	protein|expressed protein	not assigned.unknown		weakly similar to ( 144) AT5G26910 | Symbols: | unknown protein | chr5:9466804-9469523 REVERSE protein|expressed protein
IWGSC_CSS_5BL_scaff_1388238	5282	5B	261127467	C	C	T	het	17	18	het5hom3	Traes_5BL_D54F9E5CF.1	stop_gained	W803*	tGg/tAg	LOC_Os12g13150.1	protein|expressed protein	not assigned.unknown		nearly identical (1744) AT5G24350 | Symbols: | FUNCTIONS IN: molecular_function unknown; INVOLVED IN: biological_process unknown; LOCATED IN: cellular_component unknown; EXPRESSED IN: 23 plant structures; EXPRESSED DURING: 13 growth stages; CONTAINS InterPro DOMAIN/s: Secretory pathway Sec39 (InterPro:IPR013244); Has 170 Blast hits to 130 proteins in 45 species: Archae - 0; Bacteria - 5; Metazoa …
IWGSC_CSS_6AL_scaff_5834533	13005	6A	183638708	G	G	A	het	10	5	het5hom3	Traes_6AL_7088F2DCE.1	stop_gained	W571*	tgG/tgA	LOC_Os02g51430.1	protein|SEC6, putative, expressed	not assigned.unknown	SEC6	nearly identical (1130) AT1G71820 | Symbols: SEC6 | SEC6 | chr1:27010022-27016745 FORWARD Sec6 SEC6 protein|SEC6, putative, expressed
IWGSC_CSS_6BL_scaff_4310623	4980	6B		G	G	A	het	10	7	het5hom3	Traes_6BL_ADBC959A8.1	stop_gained	W400*	tgG/tgA	LOC_Os01g74460.2	protein|vacuolar fusion protein MON1 homolog A, putative, expressed	not assigned.unknown	SAND family protein	moderately similar to ( 374) AT2G28390 | Symbols: | SAND family protein | chr2:12139836-12143375 REVERSE Mon1 protein|vacuolar fusion protein MON1 homolog A, putative, expressed
IWGSC_CSS_7AL_scaff_4485472	6710	7A		G	G	A	het	36	40	het5hom3	Traes_7AL_F507A9C43.1	stop_gained	W132*	tgG/tgA	LOC_Os08g01840.1	protein|nucleic acid binding protein, putative, expressed	not assigned.unknown	nucleic acid binding	moderately similar to ( 316) AT2G02570 | Symbols: | nucleic acid binding | chr2:698361-700794 REVERSE protein|nucleic acid binding protein, putative, expressed
IWGSC_CSS_7AS_scaff_4218250	6013	7A	34016478	G	G	A	het	42	35	het5hom3	Traes_7AS_4386E1623.1	stop_gained	Q452*	Cag/Tag	LOC_Os06g10430.3	protein|protein of unknown function DUF1296 domain containing protein, expressed	not assigned.unknown		moderately similar to ( 255) AT3G13990 | Symbols: | unknown protein | chr3:4625708-4630383 REVERSEDUF1296 protein|protein of unknown function DUF1296 domain containing protein, expressed
IWGSC_CSS_7BS_scaff_3129060	1311	7B		G	G	A	het	25	11	het5hom3	Traes_7BS_A0B8020BA.1	stop_gained	W104*	tgG/tgA	LOC_Os06g06770.1	protein|OsPOP11 - Putative Prolyl Oligopeptidase homologue, expressed	not assigned.unknown		moderately similar to ( 449) AT5G25770 | Symbols: | unknown protein | chr5:8969308-8971806 REVERSE protein|OsPOP11 - Putative Prolyl Oligopeptidase homologue, expressed
IWGSC_CSS_7BS_scaff_3164314	2868	7B	65165051	G	G	A	het	15	14	het5hom3	Traes_7BS_959880F33.1	stop_gained	Q12*	Caa/Taa	LOC_Os02g20310.1	protein|expressed protein	not assigned.unknown	binding	moderately similar to ( 295) AT5G14790 | Symbols: | binding | chr5:4784058-4785508 FORWARD protein|expressed protein
IWGSC_CSS_7BL_scaff_6699277	4439	7B	242314271	G	G	A	het	5	4	het4hom3	Traes_7BL_DA7413B04.1	stop_gained	W39*	tgG/tgA	LOC_Os10g30690.1	protein|MYB family transcription factor, putative, expressed	not assigned.unknown	MYB	protein|MYB family transcription factor, putative, expressed
IWGSC_CSS_2BS_scaff_5156740	2002	2B		C	C	T	hom	0	7	het5hom3	Traes_2BS_F376833C2.1	stop_gained&splice_region_variant	W103*	tgG/tgA	LOC_Os07g36110.2	protein|expressed protein	not assigned.unknown		weakly similar to ( 125) AT2G32280 | Symbols: | unknown protein | chr2:13713210-13713977 FORWARDDUF1218 protein|expressed protein
IWGSC_CSS_4AL_scaff_7118645	4044	4A	166039955	C	C	T	het	19	16	het5hom3	Traes_4AL_F42D25A94.1	stop_gained	W104*	tgG/tgA	LOC_Os11g16390.1	protein|expressed protein	protein.degradation.ubiquitin.E3.SCF.FBOX	SKIP16	moderately similar to ( 381) AT1G06110 | Symbols: SKIP16 | SKIP16 (SKP1/ASK-interacting protein 16); protein binding | chr1:1853237-1854938 REVERSE DUF525 apaG protein|expressed protein
IWGSC_CSS_4BL_scaff_7019142	7363	4B	267049619	C	C	T	het	16	11	het5hom3	Traes_4BL_4332984FC.1	stop_gained	Q738*	Cag/Tag	LOC_Os03g09260.1	protein|ubiquitin carboxyl-terminal hydrolase 26, putative, expressed	protein.degradation.ubiquitin.ubiquitin protease	UBP26	moderately similar to ( 433) AT3G49600 | Symbols: UBP26, SUP32, ATUBP26 | UBP26 (UBIQUITIN-SPECIFIC PROTEASE 26); ubiquitin thiolesterase/ ubiquitin-specific protease | chr3:18380942-18386662 REVERSE Peptidase_C19L peptidase_C19C UCH COG5077 Peptidase_C19E Peptidase_C19H Peptidase_C19G Peptidase_C19 Peptidase_C19K Peptidase_C19D Peptidase_C19R Peptidase_C19O protein|ubiquitin carboxyl-terminal hy…
IWGSC_CSS_2BS_scaff_5233743	11495	2B	16348831	G	G	A	het	31	23	het5hom3	Traes_2BS_6F32A6AF5.2	stop_gained	Q203*	Cag/Tag	LOC_Os07g49480.1	protein|KIP1, putative, expressed	protein.postranslational modification		moderately similar to ( 236) AT2G22560 | Symbols: | FUNCTIONS IN: molecular_function unknown; INVOLVED IN: biological_process unknown; LOCATED IN: plasma membrane; EXPRESSED IN: 15 plant structures; EXPRESSED DURING: 6 growth stages; CONTAINS InterPro DOMAIN/s: KIP1-like (InterPro:IPR011684); BEST Arabidopsis thaliana protein match is: kinase interacting family protein (TAIR:AT5G10500.1); Has 478…
IWGSC_CSS_4AS_scaff_5943344	2746	4A		C	C	T	hom	0	22	het5hom3	Traes_4AS_349C5B246.2	stop_gained	Q97*	Caa/Taa	LOC_Os03g07150.1	protein|OsPP2Ac-5 - Phosphatase 2A isoform 5 belonging to family 2, expressed	protein.postranslational modification	PP2A-3	highly similar to ( 619) AT3G58500 | Symbols: PP2A-3, EP7 | PP2A-3 (PROTEIN PHOSPHATASE 2A-3); protein serine/threonine phosphatase | chr3:21635503-21638911 REVERSEhighly similar to ( 629) PP2A4_ORYSA Serine/threonine-protein phosphatase PP2A-4 catalytic subunit (EC 3.1.3.16) - Oryza sativa (Rice) PP2Ac PP2Ac ApaH Metallophos protein|OsPP2Ac-5 - Phosphatase 2A isoform 5 belonging to family 2, exp…
IWGSC_CSS_6AL_scaff_5817978	9573	6A	199040453	G	G	A	hom	1	56	het5hom3	Traes_6AL_4ACB2738B.2	stop_gained	W852*	tGg/tAg	LOC_Os07g28820.1	protein|ribonuclease 2-5A family protein, expressed	protein.postranslational modification	IRE1A	highly similar to ( 509) AT2G17520 | Symbols: IRE1A, ATIRE1-2, IRE1-2 | IRE1A; endoribonuclease/ kinase | chr2:7617504-7620929 FORWARDvery weakly similar to (80.9) CCAMK_MEDTR Calcium and calcium/calmodulin-dependent serine/threonine-protein kinase DMI-3 (EC 2.7.11.17) (Does not make infections protein 3) (CCaMK DMI3) (MtCCaMK) - Medicago truncatula (Barrel medic) Ribonuc_2-5A S_TKc S_TKc Pkinase…
IWGSC_CSS_7BL_scaff_6642062	9019	7B	245535448	G	G	A	het	26	22	het5hom3	Traes_7BL_586233664.1	stop_gained	R261*	Cga/Tga	LOC_Os06g50910.2	protein|Phosphatidylinositol kinase and FAT containing domain protein, putative, expressed	protein.postranslational modification.kinase	ATRAD3	nearly identical (2722) AT5G40820 | Symbols: ATRAD3, ATR, ATATR | ATRAD3; binding / inositol or phosphatidylinositol kinase/ phosphotransferase, alcohol group as acceptor / protein serine/threonine kinase | chr5:16343860-16353847 REVERSEnearly identical (5218) ATR_ORYSA Serine/threonine-protein kinase ATR (EC 2.7.11.1) - Oryza sativa (Rice) PI3Kc_related TEL1 PI3Kc_family PI3Kc PI3_PI4_kinase FAT…
IWGSC_CSS_6AS_scaff_4375699	96	6A	96884221	C	C	T	hom	0	6	het5hom3	Traes_6AS_901774D0F.1	stop_gained	W222*	tgG/tgA	LOC_Os02g09740.1	protein|STRUBBELIG-RECEPTOR FAMILY 7 precursor, putative, expressed	protein.postranslational modification.kinase.receptor like cytoplasmatic kinase VII	SRF8	highly similar to ( 747) AT4G22130 | Symbols: SRF8 | SRF8 (STRUBBELIG-RECEPTOR FAMILY 8); ATP binding / kinase/ protein binding / protein kinase | chr4:11724781-11727331 FORWARDmoderately similar to ( 209) NORK_PEA Nodulation receptor kinase precursor (EC 2.7.11.1) - Pisum sativum (Garden pea) S_TKc S_TKc Pkinase Pkinase_Tyr PTKc TyrKc PTKc_Jak_rpt2 PTKc_Src_like PTKc_Tec_like PTKc_Csk_like SPS1 …
IWGSC_CSS_3AS_scaff_1384332	2942	3A	6616675	G	G	A	het	16	15	het5hom3	Traes_3AS_887BF5509.1	stop_gained	W151*	tGg/tAg	LOC_Os01g04640.1	protein|reticulon domain containing protein, putative, expressed	protein.targeting.secretory pathway.plasma membrane	reticulon family protein (RTNLB9)	weakly similar to ( 184) AT3G18260 | Symbols: | reticulon family protein (RTNLB9) | chr3:6260328-6261504 REVERSE Reticulon protein|reticulon domain containing protein, putative, expressed
IWGSC_CSS_4BL_scaff_7010091	2490	4B	314249174	C	C	T	het	12	16	het5hom3	Traes_4BL_AD258E8D0.2	stop_gained&splice_region_variant	Q193*	Cag/Tag	LOC_Os03g01222.1	protein|formyl transferase, putative, expressed	PS.photorespiration	formyltetrahydrofolate deformylase/ hydroxymethyl-, formyl- and related transferase/ methyltransferase	moderately similar to ( 419) AT4G17360 | Symbols: | formyltetrahydrofolate deformylase/ hydroxymethyl-, formyl- and related transferase/ methyltransferase | chr4:9703698-9705468 REVERSE PurU purU PRK13011 purU purN PurN Formyl_trans_N protein|formyl transferase, putative, expressed
IWGSC_CSS_2BL_scaff_7980362	1506	2B	219508873	C	C	T	hom	1	40	het5hom3	Traes_2BL_FB766A312.2	stop_gained	W277*	tgG/tgA	LOC_Os07g05820.2	protein|hydroxyacid oxidase 1, putative, expressed	PS.photorespiration.glycolate oxydase	(S)-2-hydroxy-acid oxidase, peroxisomal, putative / glycolate oxidase, putative / short chain alpha-hydroxy acid oxidase, putative	highly similar to ( 620) AT3G14420 | Symbols: | (S)-2-hydroxy-acid oxidase, peroxisomal, putative / glycolate oxidase, putative / short chain alpha-hydroxy acid oxidase, putative | chr3:4821899-4823899 FORWARDhighly similar to ( 610) GOX_SPIOL Peroxisomal (S)-2-hydroxy-acid oxidase (EC 1.1.3.15) (Glycolate oxidase) (GOX) (Short chain alpha-hydroxy acid oxidase) - Spinacia oleracea (Spinach) FMN_d…
IWGSC_CSS_3AL_scaff_4371763	6875	3A	158490876	C	C	T	hom	0	47	het5hom3	Traes_3AL_299CB25A6.2	stop_gained	Q27*	Cag/Tag	LOC_Os01g64770.1	protein|polypyrimidine tract-binding protein, putative, expressed	RNA.processing	polypyrimidine tract-binding protein, putative / heterogeneous nuclear ribonucleoprotein, putative	highly similar to ( 598) AT1G43190 | Symbols: | polypyrimidine tract-binding protein, putative / heterogeneous nuclear ribonucleoprotein, putative | chr1:16275432-16278185 REVERSE protein|polypyrimidine tract-binding protein, putative, expressed
IWGSC_CSS_7BL_scaff_6751331	965	7B	191377824	C	C	T	het	2	10	het5hom3	Traes_7BL_64A1E7C6A.1	stop_gained	Q248*	Cag/Tag	LOC_Os06g23530.1	protein|pre-mRNA-splicing factor ATP-dependent RNA helicase, putative, expressed	RNA.processing.RNA helicase	ATP-dependent RNA helicase	nearly identical (1471) AT3G26560 | Symbols: | ATP-dependent RNA helicase, putative | chr3:9750122-9753719 REVERSE HrpA PRK11131 PRK11664 DEXHc DUF1605 HA2 DEXDc DEXDc protein|pre-mRNA-splicing factor ATP-dependent RNA helicase, putative, expressed
IWGSC_CSS_1AL_scaff_3906036	2585	1A		C	C	T	hom	1	28	het5hom3	Traes_1AL_3B659AABA.1	stop_gained	Q263*	Cag/Tag	LOC_Os05g37170.1	protein|transcription factor, putative, expressed	RNA.regulation of transcription.bZIP transcription factor family	bZIP family transcription factor	moderately similar to ( 385) AT1G08320 | Symbols: | bZIP family transcription factor | chr1:2622113-2627451 REVERSEmoderately similar to ( 322) HBP1C_WHEAT Transcription factor HBP-1b(c1) (Fragment) - Triticum aestivum (Wheat) protein|transcription factor, putative, expressed
IWGSC_CSS_4BL_scaff_7039044	2722	4B	105854192	G	G	A	hom	0	11	het5hom3	Traes_4BL_77C1A9AA5.3	stop_gained	Q450*	Cag/Tag	LOC_Os03g20530.1	protein|DUF630/DUF632 domains containing protein, putative, expressed	RNA.regulation of transcription.bZIP transcription factor family		moderately similar to ( 323) AT2G27090 | Symbols: | unknown protein | chr2:11567691-11570345 REVERSEDUF632 protein|DUF630/DUF632 domains containing protein, putative, expressed
IWGSC_CSS_7BS_scaff_637226	161	7B		C	C	T	het	4	4	het4hom3	Traes_7BS_FE63C2D2B.1	stop_gained	R54*	Cga/Tga	LOC_Os08g43730.1	protein|DUF630/DUF632 domains containing protein, putative, expressed	RNA.regulation of transcription.bZIP transcription factor family		moderately similar to ( 309) AT4G35240 | Symbols: | unknown protein | chr4:16761479-16764324 REVERSEDUF632 protein|DUF630/DUF632 domains containing protein, putative, expressed
IWGSC_CSS_6AS_scaff_4392209	14988	6A	7469740	G	G	A	het	42	11	het5hom3	Traes_6AS_880AC0266.1	stop_gained	Q289*	Cag/Tag	LOC_Os02g02290.1	protein|SNF2 family N-terminal domain containing protein, expressed	RNA.regulation of transcription.Chromatin Remodeling Factors	CHR2	nearly identical (1739) AT2G46020 | Symbols: CHR2, ATBRM, BRM, CHA2 | transcription regulatory protein SNF2, putative | chr2:18923304-18931769 FORWARDmoderately similar to ( 292) ISW2_ORYSA Probable chromatin remodelling complex ATPase chain (EC 3.6.1.-) (ISW2-like) (Sucrose nonfermenting protein 2 homolog) - Oryza sativa (Rice) HepA SNF2_N HELICc DEXDc DEXHc DEXDc HELICc protein|SNF2 family N-te…
IWGSC_CSS_6BL_scaff_2934810	3321	6B		G	G	A	hom	0	16	het5hom3	Traes_6BL_0FE40D887.1	stop_gained	Q84*	Caa/Taa	LOC_Os02g53230.1	protein|transcription elongation factor SPT5 homolog 1, putative, expressed	RNA.regulation of transcription.Global transcription factor group	GTA02	highly similar to ( 951) AT4G08350 | Symbols: GTA02, GTA2 | GTA2 (GLOBAL TRANSCRIPTION FACTOR GROUP A2); structural constituent of ribosome / transcription elongation regulator/ transcription factor | chr4:5286351-5292072 FORWARD SPT5 protein|transcription elongation factor SPT5 homolog 1, putative, expressed
IWGSC_CSS_2BL_scaff_8082710	3780	2B	263427299	C	C	T	hom	0	6	het5hom3	Traes_2BL_79F1B50DF.1	stop_gained	W150*	tgG/tgA	LOC_Os04g45060.1	protein|MYB family transcription factor, putative, expressed	RNA.regulation of transcription.MYB domain transcription factor family	AtMYB17	moderately similar to ( 204) AT3G61250 | Symbols: AtMYB17 | AtMYB17 (myb domain protein 17); DNA binding / transcription factor | chr3:22671306-22672551 FORWARDweakly similar to ( 179) MYB4_ORYSA Myb-related protein Myb4 (OsMyb4) (Transcription factor RLTR1) - Oryza sativa (Rice) protein|MYB family transcription factor, putative, expressed
IWGSC_CSS_4BL_scaff_7040449	4164	4B	250959876	C	C	T	het	5	8	het5hom3	Traes_4BL_B181F1FD2.2	stop_gained	W207*	tgG/tgA	LOC_Os03g13310.1	protein|MYB family transcription factor, putative, expressed	RNA.regulation of transcription.MYB domain transcription factor family	AtMYB1	weakly similar to ( 119) AT3G09230 | Symbols: AtMYB1 | AtMYB1 (myb domain protein 1); DNA binding / transcription factor | chr3:2833460-2835134 FORWARDvery weakly similar to (92.4) GAM1_ORYSA Transcription factor GAMYB (OsGAMyb) - Oryza sativa (Rice) REB1 protein|MYB family transcription factor, putative, expressed
IWGSC_CSS_3AS_scaff_3334647	3789	3A	19329183	C	C	T	het	16	10	het5hom3	Traes_3AS_B1988E355.1	stop_gained	Q666*	Cag/Tag	LOC_Os01g08510.1	protein|MAR-binding filament-like protein 1, putative, expressed	RNA.regulation of transcription.Orphan family	MFP1	moderately similar to ( 228) AT3G16000 | Symbols: MFP1 | MFP1 (MAR BINDING FILAMENT-LIKE PROTEIN 1); DNA binding | chr3:5431041-5433613 REVERSEmoderately similar to ( 221) MFP1_TOBAC MAR-binding filament-like protein 1-1 - Nicotiana tabacum (Common tobacco) protein|MAR-binding filament-like protein 1, putative, expressed
IWGSC_CSS_2AS_scaff_5265097	9229	2A	20185	C	C	T	het	35	18	het5hom3	Traes_2AS_AE82C22DB.1	stop_gained&splice_region_variant	W365*	tGg/tAg	LOC_Os09g13630.1	protein|ZOS9-03 - C2H2 zinc finger protein, expressed	RNA.regulation of transcription.Polycomb Group (PcG)	EMF2	highly similar to ( 534) AT5G51230 | Symbols: EMF2, VEF2, CYR1 | EMF2 (EMBRYONIC FLOWER 2); DNA binding / transcription factor | chr5:20824153-20829344 FORWARD protein|ZOS9-03 - C2H2 zinc finger protein, expressed
IWGSC_CSS_3B_scaff_10697731	10311	3B		C	C	T	het	9	8	het5hom3	Traes_3B_716B59142.1	stop_gained	W455*	tgG/tgA	LOC_Os01g70810.1	protein|homeobox domain containing protein, expressed	RNA.regulation of transcription.putative transcription regulator	LD	moderately similar to ( 399) AT4G02560 | Symbols: LD | LD (luminidependens); transcription factor | chr4:1123656-1128252 REVERSE protein|homeobox domain containing protein, expressed
IWGSC_CSS_6AL_scaff_5718044	2452	6A	186591596	G	G	A	het	5	6	het5hom3	Traes_6AL_DA27ABCA61.2	stop_gained	Q248*	Cag/Tag	LOC_Os02g51280.1	protein|TCP-domain protein, putative, expressed	RNA.regulation of transcription.TCP transcription factor family	TCP family transcription factor	weakly similar to ( 143) AT1G69690 | Symbols: | TCP family transcription factor, putative | chr1:26216449-26217426 FORWARDTCP protein|TCP-domain protein, putative, expressed
IWGSC_CSS_5AL_scaff_2734377	3801	5A	32975597	G	G	A	hom	0	26	het5hom3	Traes_5AL_206C0CE33.2	stop_gained	Q311*	Caa/Taa	LOC_Os12g06640.1	protein|homeodomain, putative, expressed	RNA.regulation of transcription.Trihelix, Triple-Helix transcription factor family	transcription factor	moderately similar to ( 272) AT1G21200 | Symbols: | transcription factor | chr1:7421483-7422814 FORWARD protein|homeodomain, putative, expressed
IWGSC_CSS_5BS_scaff_2250420	6949	5B	88897222	G	G	A	het	28	31	het5hom3	Traes_5BS_6AFE1F4C9.2	stop_gained	Q92*	Caa/Taa	LOC_Os12g40490.1	protein|LIM domain-containing protein, putative, expressed	RNA.regulation of transcription.unclassified	DA1	highly similar to ( 544) AT1G19270 | Symbols: DA1 | DA1 (DA 1); ubiquitin binding | chr1:6663327-6665845 FORWARD protein|LIM domain-containing protein, putative, expressed
IWGSC_CSS_7BL_scaff_6752450	3514	7B	191587938	G	G	A	het	48	44	het5hom3	Traes_7BL_8663735F2.1	stop_gained	R126*	Cga/Tga	LOC_Os06g35030.3	protein|RNA recognition motif containing protein, putative, expressed	RNA.RNA binding	CID11	moderately similar to ( 299) AT1G32790 | Symbols: CID11 | RNA-binding protein, putative | chr1:11875028-11877188 REVERSE protein|RNA recognition motif containing protein, putative, expressed
IWGSC_CSS_7BL_scaff_6746627	2054	7B	235944120	G	G	A	het	10	7	het5hom3	Traes_7BL_92495B4B7.1	stop_gained	W251*	tgG/tgA	LOC_Os06g44230.1	protein|DNA-directed RNA polymerase 3A, chloroplast precursor, putative, expressed	RNA.transcription	PDE319	nearly identical (1071) AT2G24120 | Symbols: PDE319, SCA3 | SCA3 (SCABRA 3); DNA binding / DNA-directed RNA polymerase | chr2:10249358-10254530 REVERSEnearly identical (1089) RPOT3_NICSY DNA-directed RNA polymerase 3, chloroplast precursor (EC 2.7.7.6) (T7 bacteriophage-type single subunit RNA polymerase 3) (NsRpoT-C) - Nicotiana sylvestris (Wood tobacco) RPO41 RNA_pol protein|DNA-directed RNA po…
IWGSC_CSS_7BL_scaff_6740037	2727	7B	246784662	G	G	A	het	12	10	het5hom3	Traes_7BL_6799422C4.1	stop_gained&splice_region_variant	Q29*	Cag/Tag	LOC_Os02g17780.1	protein|ent-kaurene synthase, chloroplast precursor, putative, expressed	secondary metabolism.isoprenoids.terpenoids	GA1	highly similar to ( 702) AT4G02780 | Symbols: GA1, ABC33, ATCPS1 | GA1 (GA REQUIRING 1); ent-copalyl diphosphate synthase/ magnesium ion binding | chr4:1237881-1244766 REVERSEhighly similar to ( 710) KSA_PEA Ent-kaurene synthase A, chloroplast precursor (EC 5.5.1.13) (Ent-copalyl diphosphate synthase) (KSA) - Pisum sativum (Garden pea)Terpene_cyclase_plant_C1 Terpene_synth Terpene_synth_C protein…
IWGSC_CSS_5BL_scaff_10871844	5204	5B		C	C	T	hom	1	7	het5hom3	Traes_5BL_A5A51EB18.1	stop_gained	Q349*	Cag/Tag	LOC_Os09g32952.1	protein|L-ascorbate oxidase precursor, putative, expressed	secondary metabolism.simple phenols	L-ascorbate oxidase, putative	highly similar to ( 602) AT4G39830 | Symbols: | L-ascorbate oxidase, putative | chr4:18479103-18481184 FORWARDhighly similar to ( 528) ASO_CUCSA L-ascorbate oxidase precursor (EC 1.10.3.3) (Ascorbase) (ASO) - Cucumis sativus (Cucumber) SufI Cu-oxidase_3 Cu-oxidase Cu-oxidase_2 protein|L-ascorbate oxidase precursor, putative, expressed
IWGSC_CSS_3AL_scaff_4343591	418	3A		G	G	A	hom	0	30	het5hom3	Traes_3AL_C7670D966.1	stop_gained	Q255*	Cag/Tag	LOC_Os01g59570.1	protein|senescence-induced receptor-like serine/threonine-protein kinase precursor, putative, expressed	signalling.receptor kinases.misc	light repressible receptor protein kinase	highly similar to ( 553) AT4G29990 | Symbols: | light repressible receptor protein kinase | chr4:14665802-14669438 REVERSEmoderately similar to ( 223) NORK_PEA Nodulation receptor kinase precursor (EC 2.7.11.1) - Pisum sativum (Garden pea) TyrKc Pkinase_Tyr S_TKc PTKc S_TKc Pkinase PTKc_Csk_like PTKc_Fes_like PTKc_Jak_rpt2 PTKc_Src_like PTKc_Trk PTKc_Srm_Brk PTKc_Itk PTKc_Frk_like PTKc_EphR PTKc_…
IWGSC_CSS_6AS_scaff_4353236	11567	6A	5481383	C	C	T	het	20	31	het5hom3	Traes_6AS_CBC883522.1	stop_gained	R75*	Cga/Tga	LOC_Os02g02120.1	protein|OsWAK11 - OsWAK receptor-like protein kinase, expressed	signalling.receptor kinases.misc	WAK5	highly similar to ( 502) AT1G21230 | Symbols: WAK5 | WAK5 (WALL ASSOCIATED KINASE 5); kinase/ protein serine/threonine kinase | chr1:7429980-7432346 FORWARDweakly similar to ( 181) NORK_MEDTR Nodulation receptor kinase precursor (EC 2.7.11.1) (Does not make infections protein 2) (Symbiosis receptor-like kinase) (MtSYMRK) - Medicago truncatula (Barrel medic) TyrKc S_TKc Pkinase_Tyr PTKc S_TKc Pkin…
IWGSC_CSS_6AS_scaff_4353236	11816	6A	5481632	C	C	T	het	40	37	het5hom3	Traes_6AS_CBC883522.1	stop_gained	Q158*	Caa/Taa	LOC_Os02g02120.1	protein|OsWAK11 - OsWAK receptor-like protein kinase, expressed	signalling.receptor kinases.misc	WAK5	highly similar to ( 502) AT1G21230 | Symbols: WAK5 | WAK5 (WALL ASSOCIATED KINASE 5); kinase/ protein serine/threonine kinase | chr1:7429980-7432346 FORWARDweakly similar to ( 181) NORK_MEDTR Nodulation receptor kinase precursor (EC 2.7.11.1) (Does not make infections protein 2) (Symbiosis receptor-like kinase) (MtSYMRK) - Medicago truncatula (Barrel medic) TyrKc S_TKc Pkinase_Tyr PTKc S_TKc Pkin…
IWGSC_CSS_7BL_scaff_6747206	1565	7B	190764101	C	C	T	het	12	9	het5hom3	Traes_7BL_BB32C4D68.1	stop_gained	W679*	tgG/tgA	LOC_Os06g38670.1	protein|receptor-like protein kinase precursor, putative, expressed	signalling.receptor kinases.misc	leucine-rich repeat transmembrane protein kinase	highly similar to ( 603) AT3G47570 | Symbols: | leucine-rich repeat transmembrane protein kinase, putative | chr3:17527611-17530748 FORWARDmoderately similar to ( 405) RPK1_IPONI Receptor-like protein kinase precursor (EC 2.7.11.1) - Ipomoea nil (Japanese morning glory) (Pharbitis nil) TyrKc Pkinase S_TKc PTKc S_TKc Pkinase_Tyr PTKc_Jak_rpt2 PTKc_Csk_like PTKc_Trk PTKc_Srm_Brk PTKc_Src_like PTKc_…
IWGSC_CSS_1BS_scaff_3450066	10601	1B	3801172	C	C	T	het	5	7	het5hom3	Traes_1BS_9DAB3DBA1.1	stop_gained	Q694*	Caa/Taa	LOC_Os11g35580.1	protein|disease resistance protein RPM1, putative, expressed	stress.biotic.PR-proteins	RPM1	moderately similar to ( 393) AT3G07040 | Symbols: RPM1, RPS3 | RPM1 (RESISTANCE TO P. SYRINGAE PV MACULICOLA 1); nucleotide binding / protein binding | chr3:2226244-2229024 REVERSE NB-ARC protein|disease resistance protein RPM1, putative, expressed
IWGSC_CSS_2BS_scaff_5245446	9727	2B		G	G	A	het	31	16	het5hom3	Traes_2BS_221659629.1	stop_gained	Q630*	Caa/Taa	LOC_Os04g02110.2	protein|disease resistance protein RGA3, putative, expressed	stress.biotic.PR-proteins	disease resistance protein (NBS-LRR class)	moderately similar to ( 318) AT3G14460 | Symbols: | disease resistance protein (NBS-LRR class), putative | chr3:4851990-4856264 REVERSE NB-ARC protein|disease resistance protein RGA3, putative, expressed
IWGSC_CSS_6AS_scaff_4428959	10797	6A	7109102	C	C	T	hom	0	7	het5hom3	Traes_6AS_F9770B3A1.3	stop_gained	W274*	tgG/tgA	LOC_Os01g41770.1	protein|leucine rich repeat protein, putative, expressed	stress.biotic.PR-proteins	disease resistance family protein	moderately similar to ( 416) AT2G34930 | Symbols: | disease resistance family protein | chr2:14737169-14739886 REVERSEmoderately similar to ( 223) RPK1_IPONI Receptor-like protein kinase precursor (EC 2.7.11.1) - Ipomoea nil (Japanese morning glory) (Pharbitis nil) protein|leucine rich repeat protein, putative, expressed
IWGSC_CSS_7BL_scaff_6742469	3741	7B	249957716	C	C	T	het	43	20	het5hom3	Traes_7BL_D883CBF5B.1	stop_gained	R555*	Cga/Tga	LOC_Os11g41540.1	protein|disease resistance RPP8-like protein 3, putative, expressed	stress.biotic.PR-proteins	disease resistance protein (CC-NBS-LRR class)	moderately similar to ( 271) AT1G50180 | Symbols: | disease resistance protein (CC-NBS-LRR class), putative | chr1:18584235-18587136 FORWARD NB-ARC protein|disease resistance RPP8-like protein 3, putative, expressed
IWGSC_CSS_4AL_scaff_7106855	5166	4A	147685446	G	G	A	het	6	8	het5hom3	Traes_4AL_7468B642E.1	stop_gained	Q316*	Caa/Taa	LOC_Os12g37580.1	protein|ABC transporter, ATP-binding protein, putative, expressed	transport.ABC transporters and multidrug resistance systems	ATMRP14	nearly identical (1363) AT3G59140 | Symbols: ATMRP14 | ATMRP14; ATPase, coupled to transmembrane movement of substances | chr3:21863519-21868701 REVERSEweakly similar to ( 116) MDR_ORYSA Putative multidrug resistance protein (P-glycoprotein) - Oryza sativa (Rice) ABCC_MRP_domain2 ABCC_MRP_domain1 MdlB ABCC_NFT1 SunT ABCC_SUR2 ABCC_Glucan_exporter_like CydD ABC_MTABC3_MDL1_MDL2 PRK10790 ABCC_ATM1_…
IWGSC_CSS_7AL_scaff_4472154	781	7A		C	C	T	het	12	12	het5hom3	Traes_7AL_8B7B9236A.1	stop_gained	W56*	tgG/tgA	LOC_Os06g36210.1	protein|amino acid transporter, putative, expressed	transport.amino acids	AAP3	highly similar to ( 507) AT1G77380 | Symbols: AAP3, ATAAP3 | AAP3; amino acid transmembrane transporter | chr1:29075201-29077252 REVERSE Aa_trans protein|amino acid transporter, putative, expressed
IWGSC_CSS_5BL_scaff_10866755	466	5B	163177240	G	G	A	het	26	16	het5hom3	Traes_5BL_770E74085.2	stop_gained	W148*	tgG/tgA	LOC_Os09g27240.1	protein|mitochondrial carrier protein, putative, expressed	transport.metabolite transporters at the mitochondrial membrane	mitochondrial substrate carrier family protein	moderately similar to ( 241) AT1G72820 | Symbols: | mitochondrial substrate carrier family protein | chr1:27403457-27404506 FORWARD protein|mitochondrial carrier protein, putative, expressed
IWGSC_CSS_4BS_scaff_4892838	5815	4B	6617024	G	G	A	hom	0	24	het5hom3	Traes_4BS_6527BBD54.1	stop_gained	Q234*	Cag/Tag	LOC_Os03g46470.1	protein|metal cation transporter, putative, expressed	transport.metal	ZIP10	moderately similar to ( 305) AT1G31260 | Symbols: ZIP10 | ZIP10 (ZINC TRANSPORTER 10 PRECURSOR); cation transmembrane transporter/ metal ion transmembrane transporter | chr1:11175559-11177362 REVERSE Zip protein|metal cation transporter, putative, expressed
IWGSC_CSS_4BS_scaff_4879610	5091	4B	194798094	G	G	A	hom	0	35	het5hom3	Traes_4BS_0B80EB8AF.1	stop_gained	W179*	tgG/tgA	LOC_Os12g03230.1	protein|MATE efflux family protein, putative, expressed	transport.misc	MATE efflux family protein	moderately similar to ( 288) AT1G33110 | Symbols: | MATE efflux family protein | chr1:12005084-12008040 FORWARD NorM MatE protein|MATE efflux family protein, putative, expressed
IWGSC_CSS_5BL_scaff_10879329	13185	5B	245371648	G	G	A	het	6	8	het5hom3	Traes_5BL_FC28B66D8.2	stop_gained	W232*	tGg/tAg	LOC_Os08g45000.1	protein|inorganic phosphate transporter, putative, expressed	transport.phosphate	carbohydrate transmembrane transporter/ phosphate transmembrane transporter/ sugar:hydrogen symporter	highly similar to ( 721) AT3G54700 | Symbols: | carbohydrate transmembrane transporter/ phosphate transmembrane transporter/ sugar:hydrogen symporter | chr3:20248463-20250070 REVERSE Sugar_tr protein|inorganic phosphate transporter, putative, expressed
