# Supplementary material for: Genome-Wide Identification and Expression Profiling of the TCP Family Genes in Spike and Grain Development of Wheat (Triticum aestivum L.)
Source: Front Plant Sci. 2018 Sep 10;9:1282. doi: 10.3389/fpls.2018.01282 (PMC6160802; doi:10.3389/fpls.2018.01282)
Supplement: TABLE S4 — List of important genes with stop_gained mutant sites in the Kronos mutant L3090. [file Table_8.xls]

## Sheet: L3090 stop gain
Supplemental Table 4 List of important genes with stop_gained mutant sites in the Kronos mutant L3090.
Effect_gene	MapMan-Annotation
cell
Traes_4AS_184AF3824	cell.cycle
Traes_4AS_3EF63342E	cell.cycle
Traes_2BL_DCA0AFEE6	cell.organisation
Traes_6AL_AC4D1A67F	cell.organisation
development
Traes_1BL_667A4DAAF	development.unspecified
Traes_2BL_2784BC27C	development.unspecified
Traes_3AS_5932BE6D9	development.unspecified
Traes_7AL_D7FA36B92	development.unspecified
Traes_6BL_574F391B8	development.unspecified
Traes_4BL_5FD1C7C2C	development.unspecified
hormone
Traes_5BL_10EF2471E	hormone metabolism.ethylene.synthesis-degradation
Traes_6AL_022875F09	hormone metabolism.ethylene.synthesis-degradation
RNA
Traes_3AL_299CB25A6	RNA.processing
Traes_7BL_64A1E7C6A	RNA.processing.RNA helicase
Traes_1AL_3B659AABA	RNA.regulation of transcription.bZIP transcription factor family
Traes_4BL_77C1A9AA5	RNA.regulation of transcription.bZIP transcription factor family
Traes_6AS_880AC0266	RNA.regulation of transcription.Chromatin Remodeling Factors
Traes_2BL_79F1B50DF	RNA.regulation of transcription.MYB domain transcription factor family
Traes_4BL_B181F1FD2	RNA.regulation of transcription.MYB domain transcription factor family
Traes_3AS_B1988E355	RNA.regulation of transcription.Orphan family
Traes_6AL_DA27ABCA61	RNA.regulation of transcription.TCP transcription factor family (TaTCP9)
Traes_5AL_206C0CE33	RNA.regulation of transcription.Trihelix, Triple-Helix transcription factor family
Traes_5BS_6AFE1F4C9	RNA.regulation of transcription.unclassified
Traes_7BL_8663735F2	RNA.RNA binding
