# Supplementary material for: Genome-Wide Identification and Expression Profiling of the TCP Family Genes in Spike and Grain Development of Wheat (Triticum aestivum L.)
Source: Front Plant Sci. 2018 Sep 10;9:1282. doi: 10.3389/fpls.2018.01282 (PMC6160802; doi:10.3389/fpls.2018.01282)
Supplement: TABLE S5 — List of important genes with splicing mutation sites in the Kronos mutant L3090. [file Table_9.xls]

## Sheet: L3090 splice
Supplemental Table 5 List of important genes with splicing mutation sites in the Kronos mutant L3090.
Effect_gene	MapMan-Annotation
cell
Traes_4BL_56CAC194E	cell.division
Traes_5AS_5D1895E69	cell.organisation
Traes_5BL_91CFC2096	cell.organisation
Traes_6AL_DC48CF291	cell.organisation
development
Traes_7AS_FB2A769B5	development.squamosa promoter binding like (SPL)
Traes_4AL_1B3E7B791	development.unspecified
Traes_4AS_BE9625780	development.unspecified
Traes_4BL_28618DD29	development.unspecified
Traes_6AL_2883E87C3	development.unspecified
Traes_7BS_581AA844D	development.unspecified
hormone
Traes_6BS_0A74A5734	hormone metabolism.abscisic acid.synthesis-degradation
RNA
Traes_2BS_19E353755	RNA.processing
Traes_2AS_60714BBEA	RNA.processing
Traes_2AS_D2FB48992	RNA.processing.splicing
Traes_3AL_B77C65A22	RNA.regulation of transcription.Chromatin Remodeling Factors
Traes_4BS_7CB794B52	RNA.regulation of transcription.Chromatin Remodeling Factors
Traes_5AL_3AD3D4BCE	RNA.regulation of transcription.Chromatin Remodeling Factors
Traes_4AS_7220D33B3	RNA.regulation of transcription.G2-like transcription factor family, GARP
Traes_7AL_4E68C2154	RNA.regulation of transcription.G2-like transcription factor family, GARP
Traes_7BL_DF38319C3	RNA.regulation of transcription.Histone acetyltransferases
Traes_2BL_E209BD69C	RNA.regulation of transcription.JUMONJI family
Traes_4AL_6D33E3015	RNA.regulation of transcription.putative transcription regulator
Traes_4AS_9B8749CEB	RNA.regulation of transcription.putative transcription regulator
Traes_2BL_70B441677	RNA.regulation of transcription.SET-domain transcriptional regulator family
Traes_4AL_D60A39314	RNA.RNA binding
Traes_5AL_1DB1259A9	RNA.RNA binding
Traes_5BL_B1F704307	RNA.transcription
